# Supplementary material
Source: PubMed Central journal article supplement (PMC8772604)

# Appendix B: Complete theory of change for community advisory boards in the European Organisation for Rare Diseases' EuroCAB program

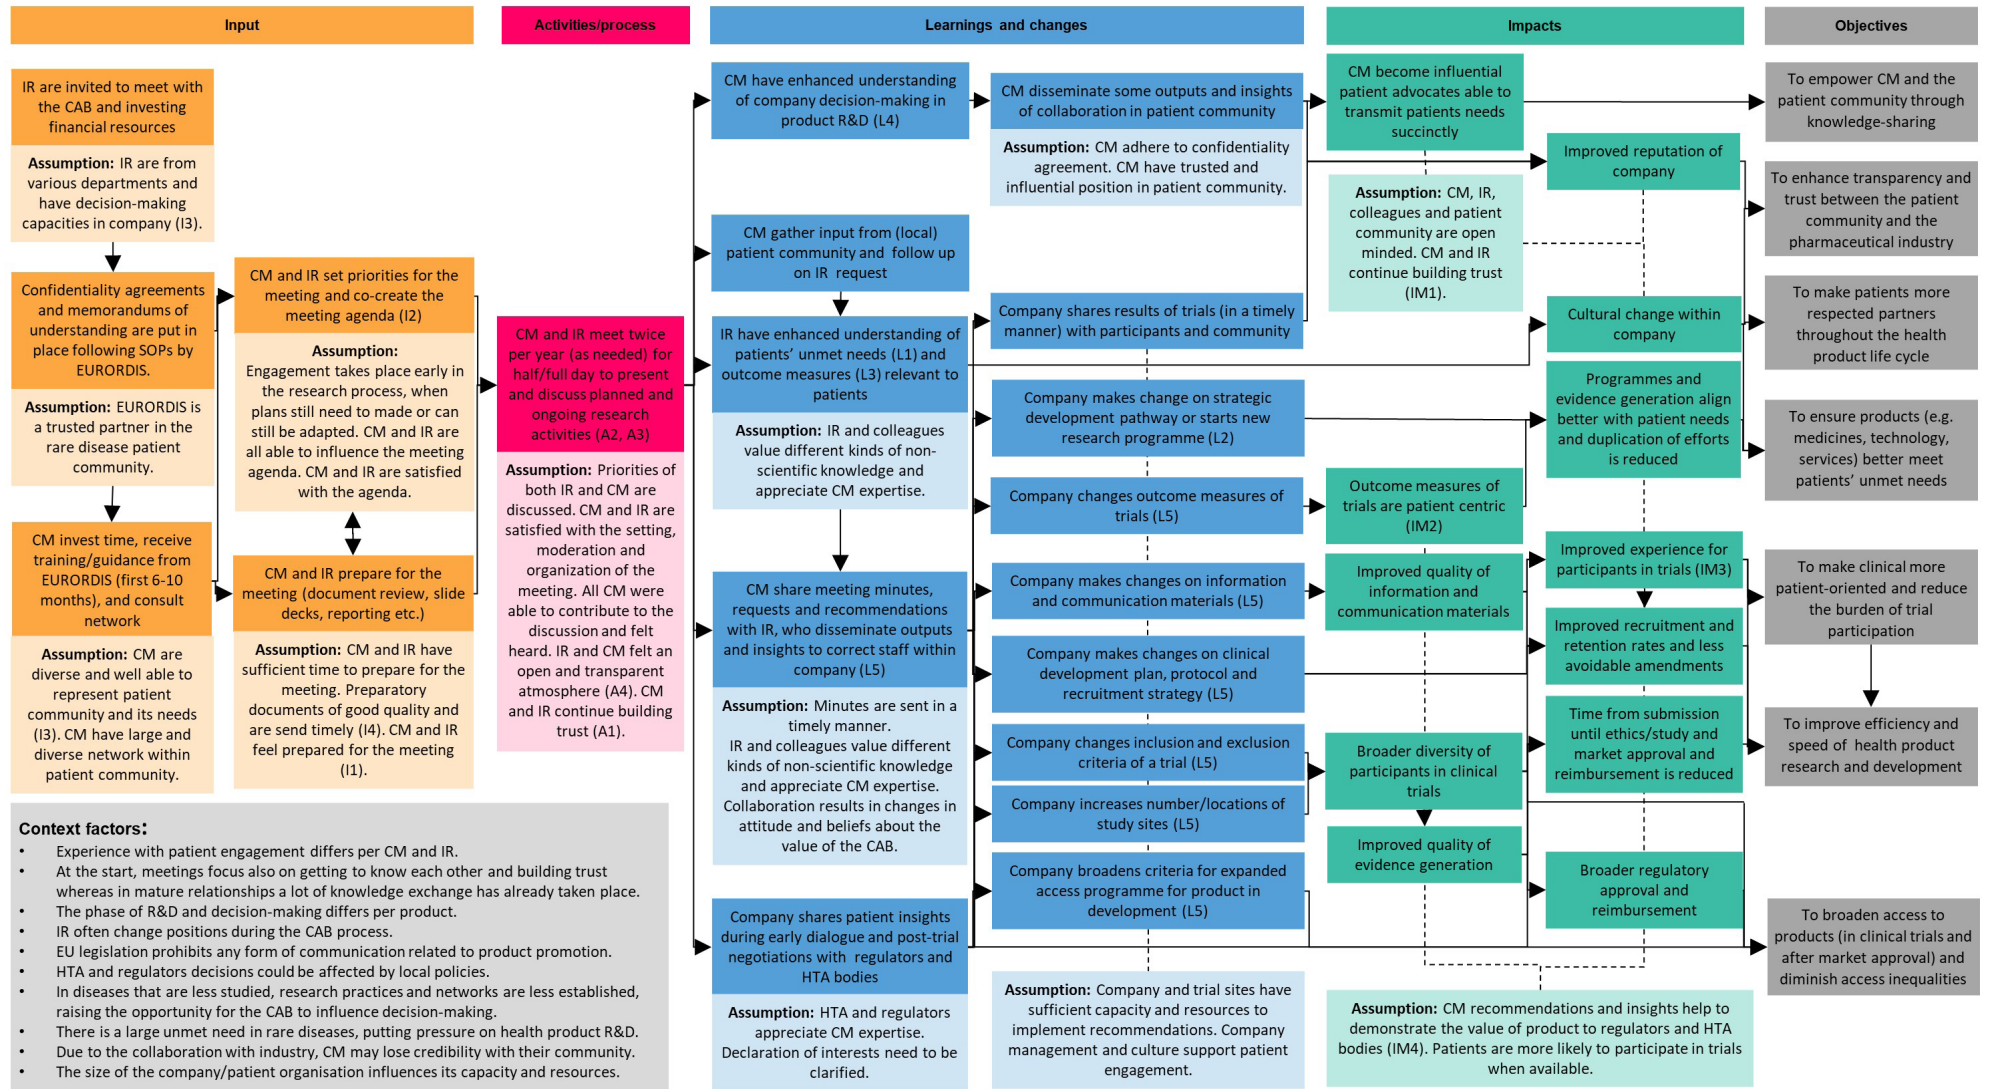

Supplement: jpcrr-9.1.46_suppl_appendix_B.pdf [file jpcrr-9.1.46_suppl_appendix_B.pdf]
